# Supplementary material for: TGFβ1 in Cancer-Associated Fibroblasts Is Associated With Progression and Radiosensitivity in Small-Cell Lung Cancer
Source: Front Cell Dev Biol. 2021 May 20;9:667645. doi: 10.3389/fcell.2021.667645 (PMC8172974; doi:10.3389/fcell.2021.667645)
Supplement: Supplementary file 3 [file Data_Sheet_1.ZIP]

Archive with 27 entries (24 files):
- original images/
- original images/Supplementary Fig. S6/
- original images/Supplementary Fig. S6/Supplementary Fig. S6.HF-1.GAPDH.Tif
- original images/Supplementary Fig. S6/Supplementary Fig. S6.HF-1.TGFβ1 (2).Tif
- original images/Supplementary Fig. S6/Supplementary Fig. S6.HF-1.TGFβ1.Tif
- original images/Supplementary Fig. S6/Supplementary Fig. S6.LLC.GAPDH.Tif
- original images/Supplementary Fig. S6/Supplementary Fig. S6.LLC.TGFβ1(2).Tif
- original images/Supplementary Fig. S6/Supplementary Fig. S6.LLC.TGFβ1.Tif
- original images/Supplementary Fig. S6/Supplementary Fig. S6.MEF.GAPDH.Tif
- original images/Supplementary Fig. S6/Supplementary Fig. S6.MEF.TGFβ1(2).Tif
- original images/Supplementary Fig. S6/Supplementary Fig. S6.MEF.TGFβ1.Tif
- original images/Supplementary Fig. S7/
- original images/Supplementary Fig. S7/Supplementary Fig. S7.H446.caspase3.tif
- original images/Supplementary Fig. S7/Supplementary Fig. S7.H446.cleaved-caspase3.tif
- original images/Supplementary Fig. S7/Supplementary Fig. S7.H446.GAPDH.tif
- original images/Supplementary Fig. S7/Supplementary Fig. S7.H446.PARP.Tif
- original images/Supplementary Fig. S7/Supplementary Fig. S7.H446.βactin.Tif
- original images/Supplementary Fig. S7/Supplementary Fig. S7.KLN205.caspase3.Tif
- original images/Supplementary Fig. S7/Supplementary Fig. S7.KLN205.cleaved-caspase3.Tif
- original images/Supplementary Fig. S7/Supplementary Fig. S7.KLN205.GAPDH.Tif
- original images/Supplementary Fig. S7/Supplementary Fig. S7.KLN205.prap.Tif
- original images/Supplementary Fig. S7/Supplementary Fig. S7.KLN205.βactin.Tif
- original images/Supplementary Fig. S7/Supplementary Fig. S7.LLC.caspase3.Tif
- original images/Supplementary Fig. S7/Supplementary Fig. S7.LLC.cleaved-caspase3.Tif
- original images/Supplementary Fig. S7/Supplementary Fig. S7.LLC.GAPDH.Tif
- original images/Supplementary Fig. S7/Supplementary Fig. S7.LLC.PRAP.Tif
- original images/Supplementary Fig. S7/Supplementary Fig. S7.LLC.βactin.Tif
